# Supplementary material for: Ketogenic diet promotes tumor ferroptosis but induces relative corticosterone deficiency that accelerates cachexia
Source: PubMed Central journal article supplement (PMC9949105; doi:10.1101/2023.02.17.528937), 2023-02-18
Supplement: NIHPP2023.02.17.528937v1-supplement-2.pdf [file NIHPP2023.02.17.528937v1-supplement-2.pdf]

1078

1079

1080

1081 SUPPLEMENTAL INFORMATION TITLES AND LEGENDS

1082 **Figure S1. Cachectic phenotype of C26 and KPC murine models.** (A) Graphical summary of the  
1083 experimental protocol. (B-C) Weight trajectories of C26 tumor-bearing mice and littermate  
1084 controls (C), and KPC tumor-bearing mice and PC controls (C) on KD or NF diets since they were  
1085 enrolled into the study until they reached cachectic endpoint. (D-E) Organ weights of cachectic  
1086 C26 tumor-bearing mice and littermates (n=10-15) (D), and cachectic KPC tumor-bearing mice  
1087 and PC controls (n=9-10) (E) fed either KD or NF diets. (F-G) mRNA expression of the PPAR $\alpha$   
1088 target genes *Acadm* (F) and *Hmgsc2* (G) in C26 tumor-bearing mice and littermate controls fed  
1089 KD or NF (n=5-7). (H-I) Cumulative food intake of KD- or NF-fed C26-tumor bearing mice and  
1090 littermates (n=5 LM, n=12 C26) (H), and KD- or NF-fed KPC tumor-bearing mice and PC controls  
1091 (n=10) (I) during the last 4 days before endpoint.

1092 Data are expressed as the mean  $\pm$  SEM. One-way ANOVA with Tukey's correction for post hoc  
1093 testing was used in (D-G). Two-way ANOVA statistical tests with Tukey's correction for post hoc  
1094 comparisons were performed in (H-I). \* p-value < 0.05, \*\* p-value < 0.01, \*\*\*\* p-value <  
1095 0.0001.

1096 **Supplemental Table 1. Macronutrient composition and caloric profile of standard and**  
1097 **ketogenic diets.**

1098 **Figure S2. Intratumoral accumulation of lipids and saturation of the GSH system causes**  
1099 **ferroptotic cell death.** (A) Schematic representation of the GSH pathway for detoxification of  
1100 LPPs. (B) PCA of tumors from C26 tumor-bearing mice fed NF or KD (n=7). (B) PCA of untargeted  
1101 metabolomics in the tumors of C26 mice fed KD or NF. (C-F) Quantification of ophthalmate (C),  
1102 carnosine (D), hypotaurine (E) and taurine (F) metabolites by UPLC-MS/MS in the tumor of C26  
1103 mice fed KD or NF (n=7). (G) Quantification by UPLC-MS/MS of GSH/GSSG ratio in the tumor of  
1104 C26 mice fed KD or NF, untreated or treated with NAC (n=5-7). (H) Oil-Red-O staining of tumors  
1105 from C26 mice on KD or NF. (I) Western blot of tumor lysates from C26 mice fed KD or NF

1106 stained for Caspase-3 and BAX apoptotic markers (n=5). (J) Immunohistochemistry staining of  
1107 tumors from C26 mice fed KD or NF with the proliferation marker Ki67. (K-N) Quantification by  
1108 flow cytometry of neutrophils (K), T-cells (L), macrophages (M) and monocytes (N), in the tumor  
1109 of C26 mice fed KD or NF (n=3-4).

1110 Data are expressed as the mean  $\pm$  SEM. Statistical analysis in (B) is described in the Methods  
1111 section/Chapter 4. Statistical differences in (C-F, K-N) were examined using an unpaired two-  
1112 tailed Student's t-test with Welch's correction. One-way ANOVA with Tukey's correction for  
1113 post hoc testing was used in (G). \* p-value < 0.05, \*\* p-value < 0.01, \*\*\*\* p-value < 0.0001.

1114

1115 **Figure S3. Biochemical deficiency in the corticosterone synthesis pathway in the adrenal**  
1116 **cortex of tumor-bearing mice fed ketogenic diet.** (A) Murine synthetic pathway of  
1117 corticosterone in the cortex of the adrenal glands. (B) Corticosterone levels at baseline (prior to  
1118 diet change), 4 days after the start of the experiment, and at endpoint (cachexia) in C26 tumor-  
1119 bearing mice and littermate controls fed KD or NF (n=5 LM, n=10-14 C26). (C) GSEA pathway  
1120 analysis of cholesterol homeostasis and steroid biosynthesis in tumor-bearing KD-fed KPC mice  
1121 compared to NF-fed KPC (n=5). (D) Plasma concentration of the pro-inflammatory cytokine IL-6  
1122 in C26 tumor-bearing mice and control littermates on NF or KD diets at endpoint (n=5 LM, n=9-  
1123 10 C26).

1124 Data are expressed as the mean  $\pm$  SEM. One-way ANOVA with Tukey's correction for post hoc  
1125 testing was used in (B, D). Statistical analysis in (C) is described in Methods. \* p-value < 0.05, \*\*  
1126 p-value < 0.01, \*\*\* p-value < 0.001, \*\*\*\* p-value < 0.0001.

1127 **Figure S4. Extended metabolic profiling of cachectic C26 and KPC mice.** (A-B) Plasma urea  
1128 levels in cachectic C26 tumor-bearing mice and littermate controls (n=5 LM, n=10-11 C26) (A),  
1129 and cachectic KPC tumor-bearing mice and PC controls (n=5-8) (B) fed either KD or NF diets. (C)  
1130 PCA of hepatic metabolomics in C26 tumor-bearing mice and control littermates fed with KD or  
1131 NF (n=5-6).

1132 Data are expressed as the mean  $\pm$  SEM. One-way ANOVA with Tukey's correction for post hoc  
1133 testing was used in (A-B). Statistical analysis in (C) is described in Methods. \* p-value < 0.05, \*\*  
1134 p-value < 0.01, \*\*\*\* p-value < 0.0001.

1135

1136 **Figure S5. Extended data on the systemic effects of Dexamethasone treatment.** (A) Weight  
1137 trajectories of C26 tumor-bearing mice treated with Dexamethasone and fed with either KD or  
1138 NF. (B) Survival of littermate controls, and C26 tumor-bearing mice treated or untreated with  
1139 Dexamethasone, fed with KD or NF (n=7 LM, n=17-18 C26, n=7 C26 + Dex). (C) Percentage of  
1140 mice in each group that were sacrificed because of cachexia (OS) or tumor size (PFS) endpoints.  
1141 (D) Quantification by UPLC-MS/MS of metabolites involved in fatty acid metabolism in the liver  
1142 of C26 tumor-bearing mice on either KD or NF diets, untreated or treated with Dexamethasone  
1143 (n=5). (E) Organ weights of C26 tumor-bearing mice untreated or treated with Dexamethasone  
1144 after 4 days of treatment (n=10-12 C26, n=3 C26 + Dex). (F-G) Cumulative water intake (F) and  
1145 total movement (G) during the last 4 days before endpoint in littermate controls and C26  
1146 tumor-bearing mice, untreated or treated with Dexamethasone, fed KD or NF (n=7).

1147 Data are expressed as the mean  $\pm$  SEM. Survival: OS + PFS. Kaplan–Meier curves in (B-C) were  
1148 statistically analyzed by using the log-rank (Mantel–Cox) test. One-way ANOVA with Tukey's  
1149 correction for post hoc testing was used in (E). Analysis in (D, F-G) is described in Methods. \* p-  
1150 value < 0.05, \*\* p-value < 0.01, \*\*\* p-value < 0.001, \*\*\*\* p-value < 0.0001.

1151

1152

1153

1154

1155

1156

1157

1158

1159

1160

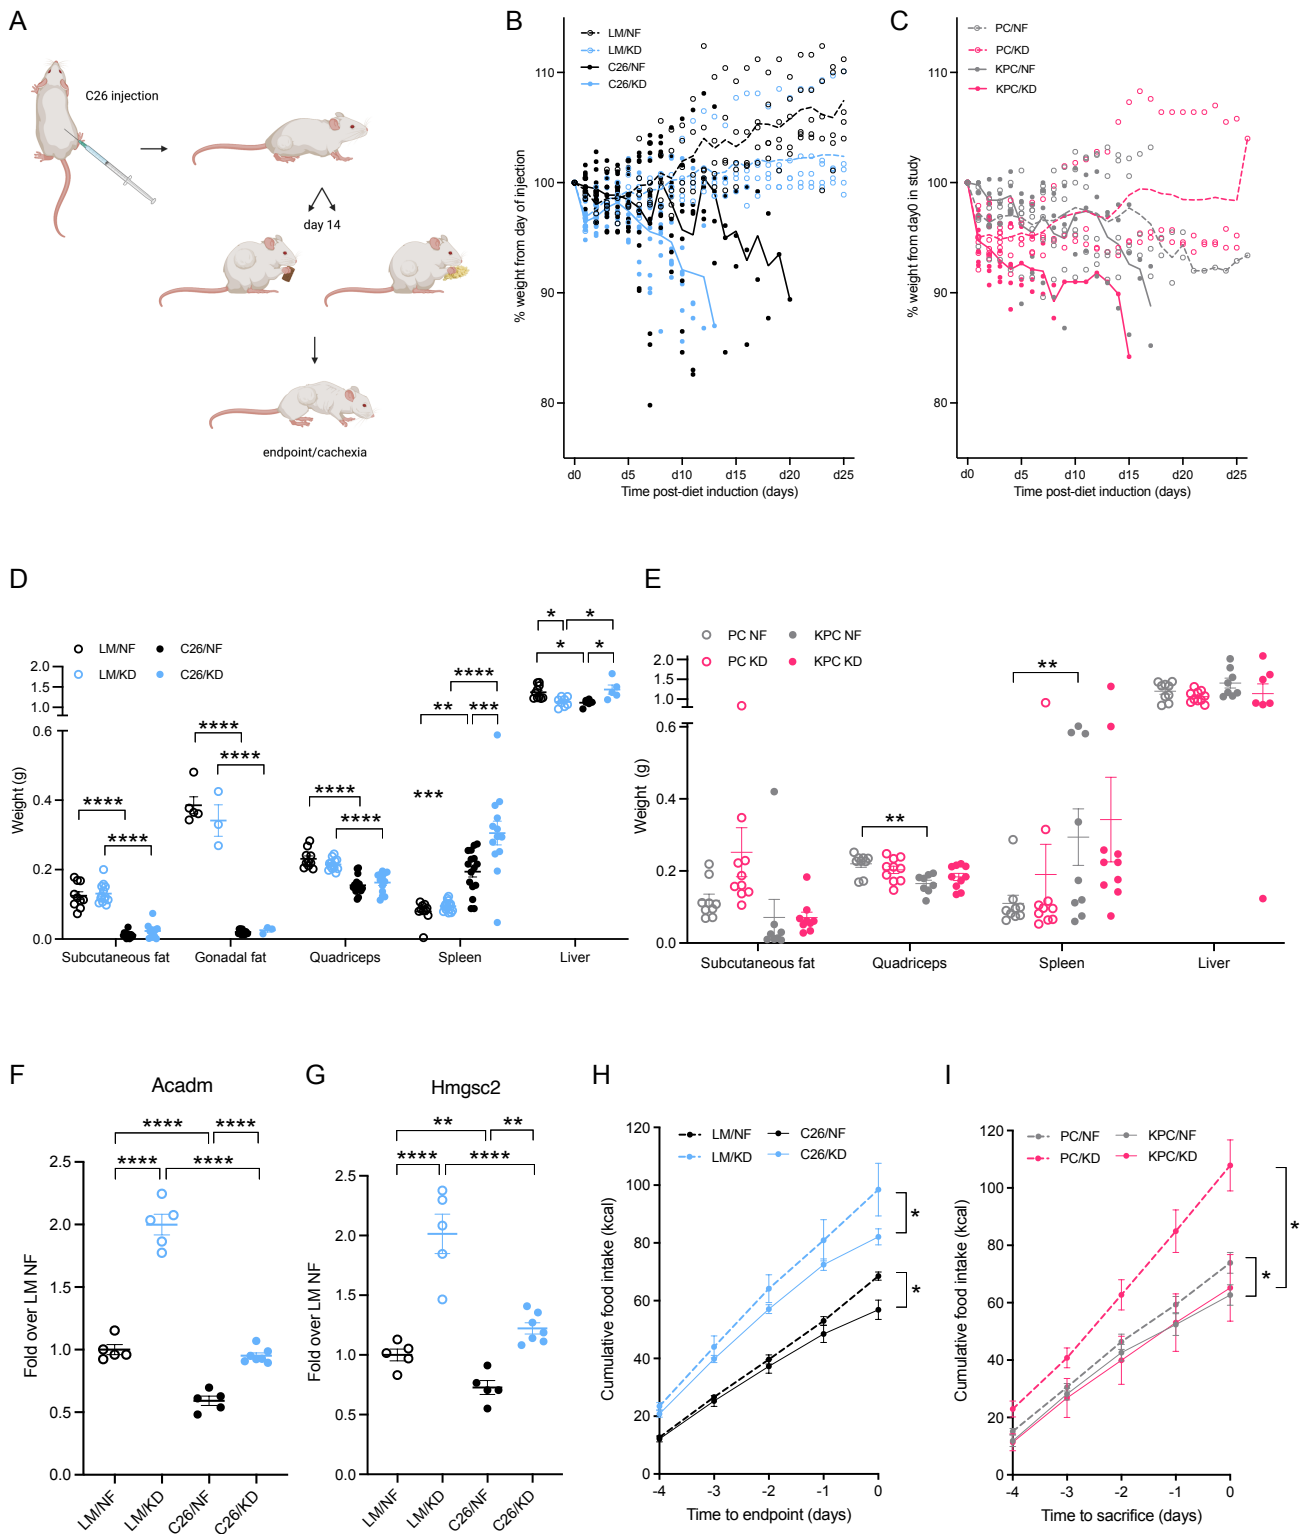

Supplementary Figure 1



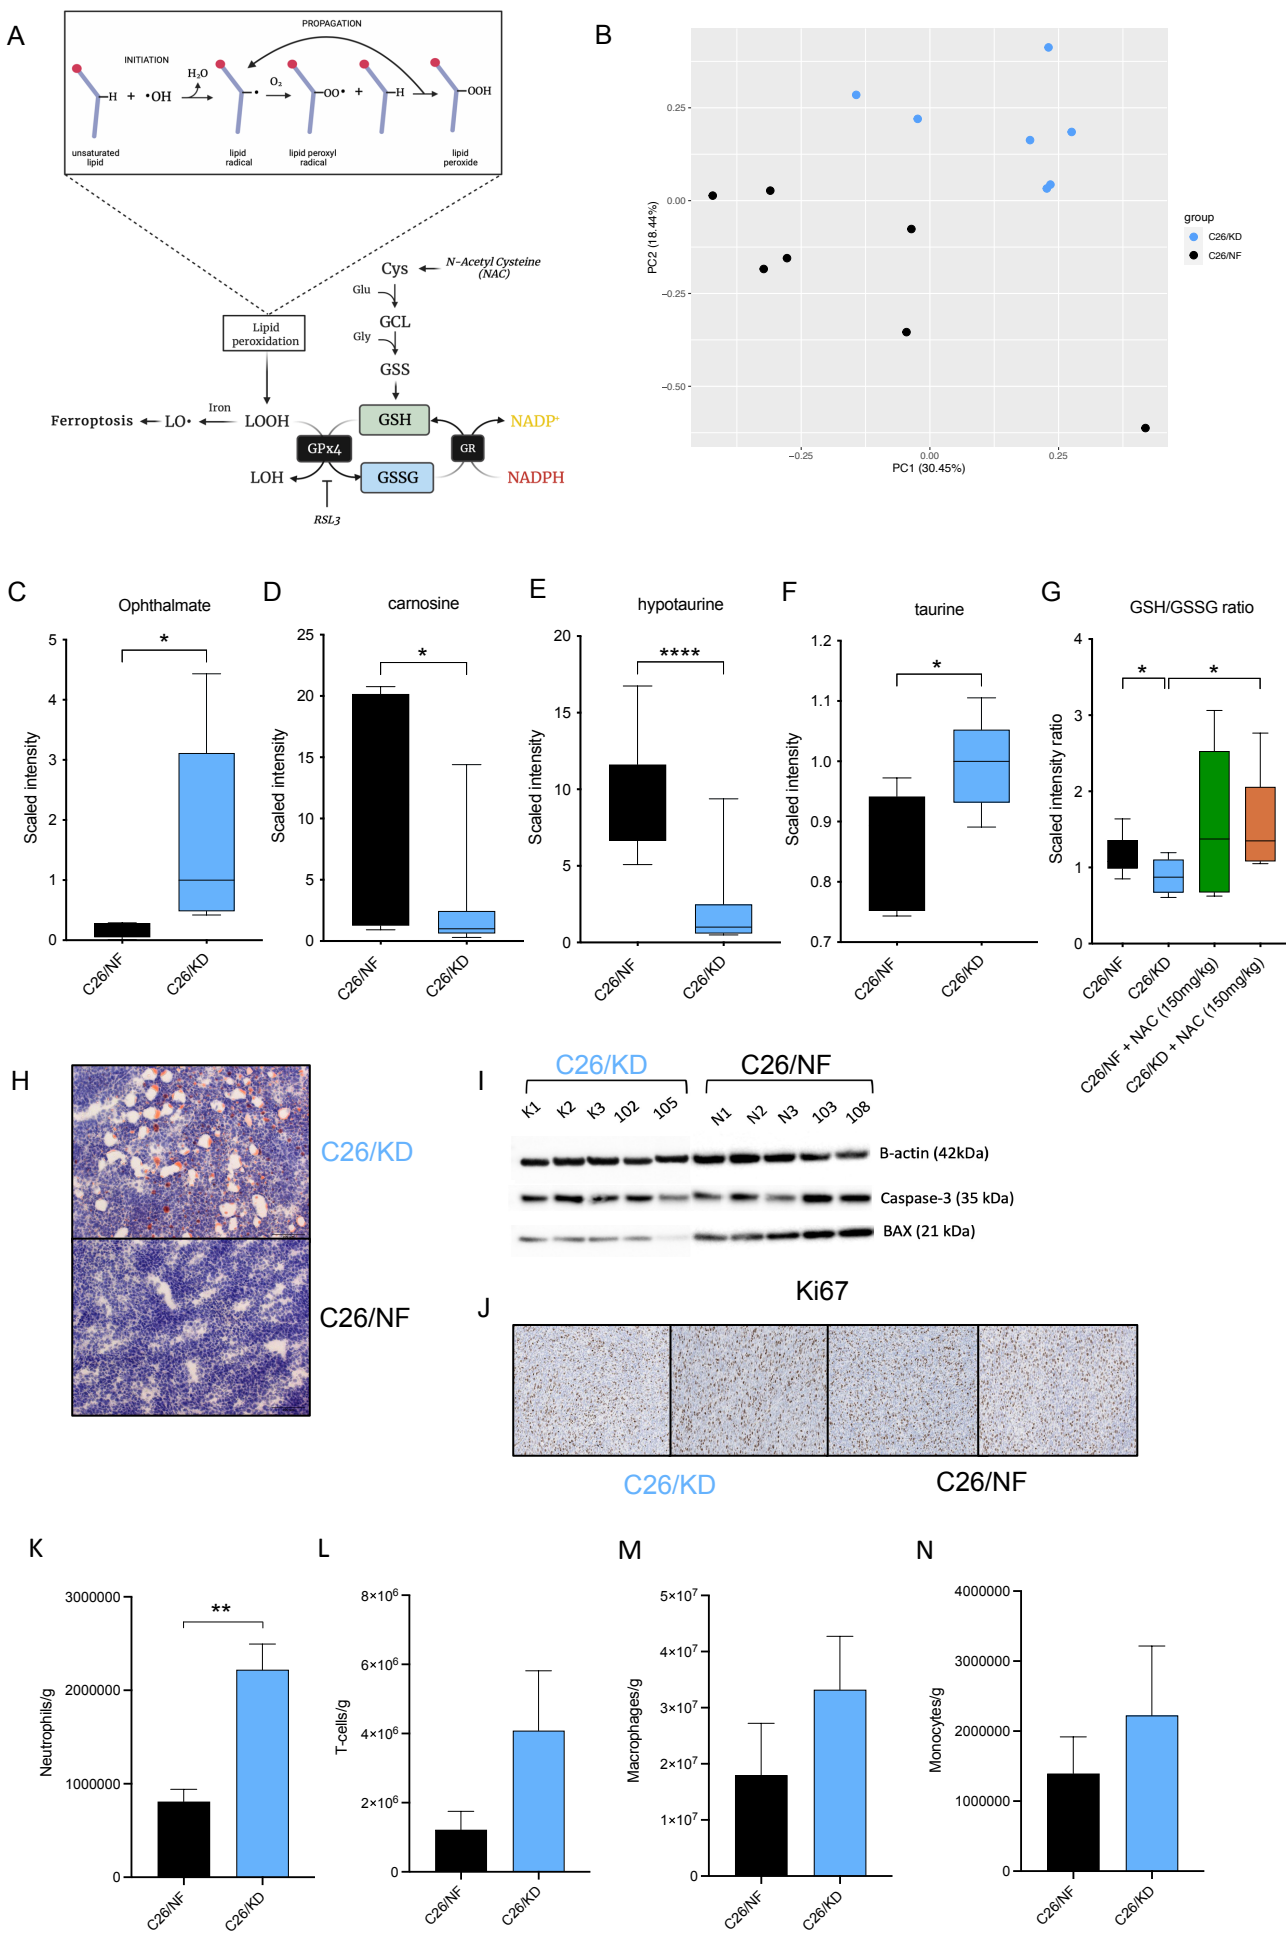

Supplementary Figure 2

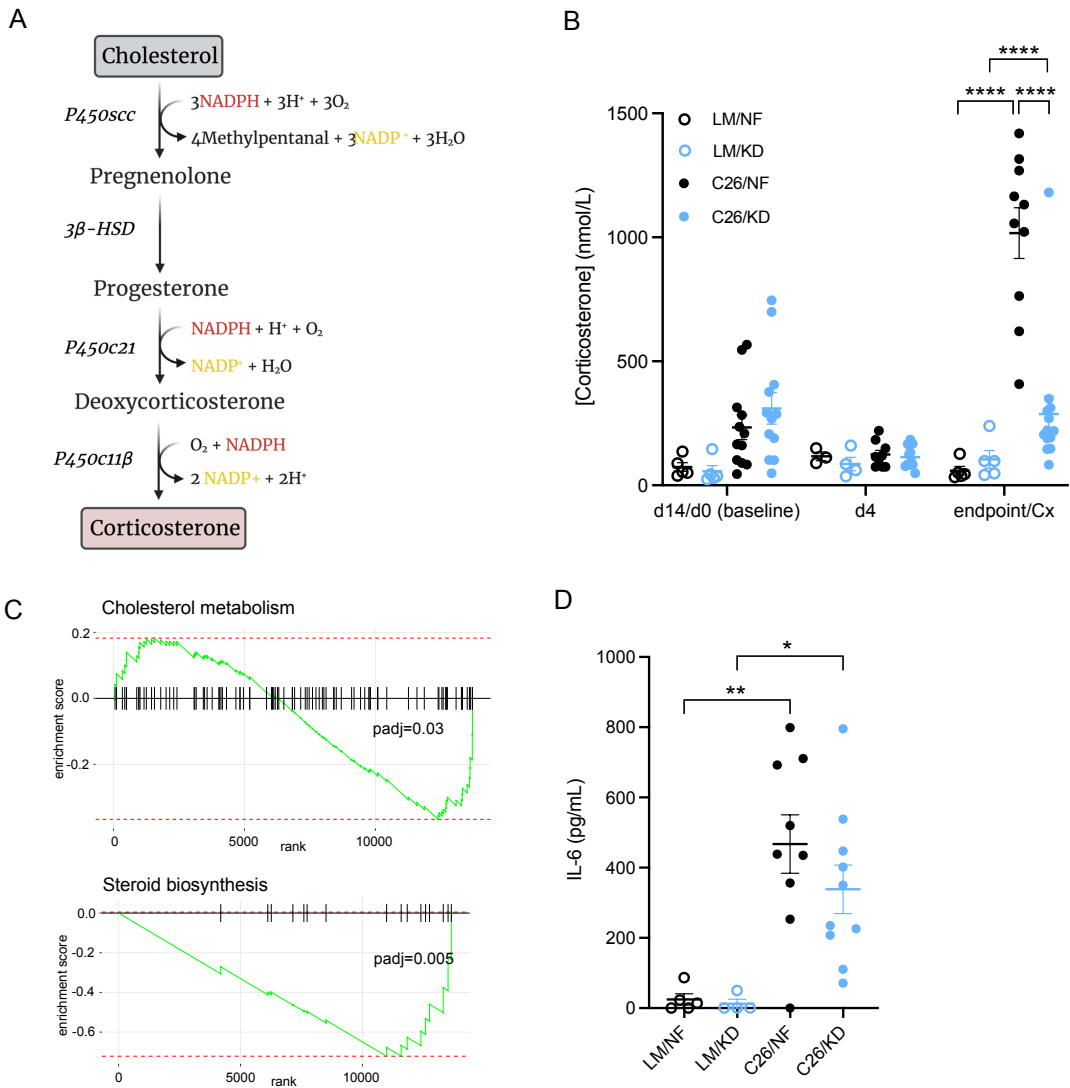

Supplementary Figure 3

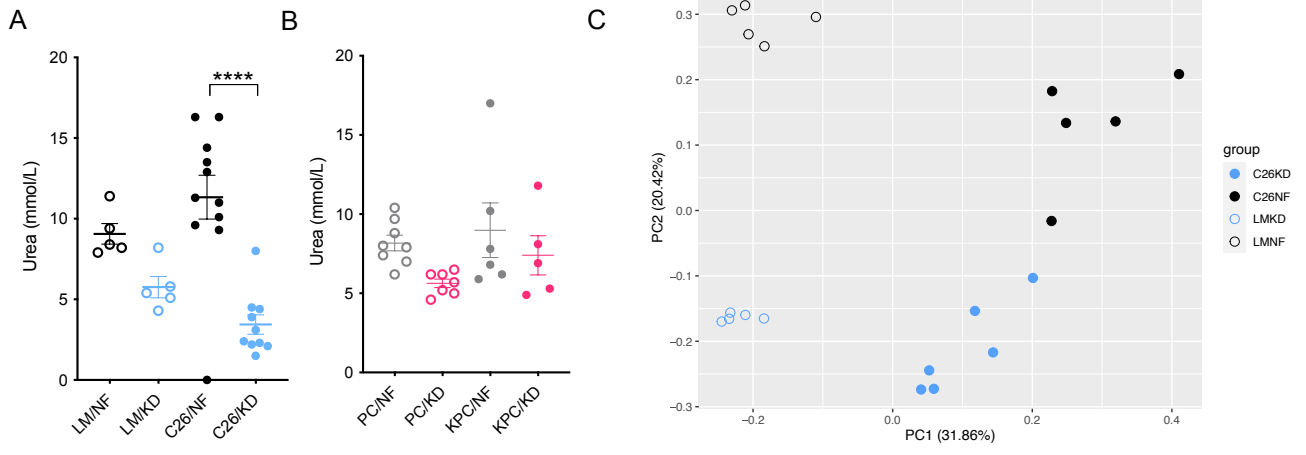

Supplementary Figure 4

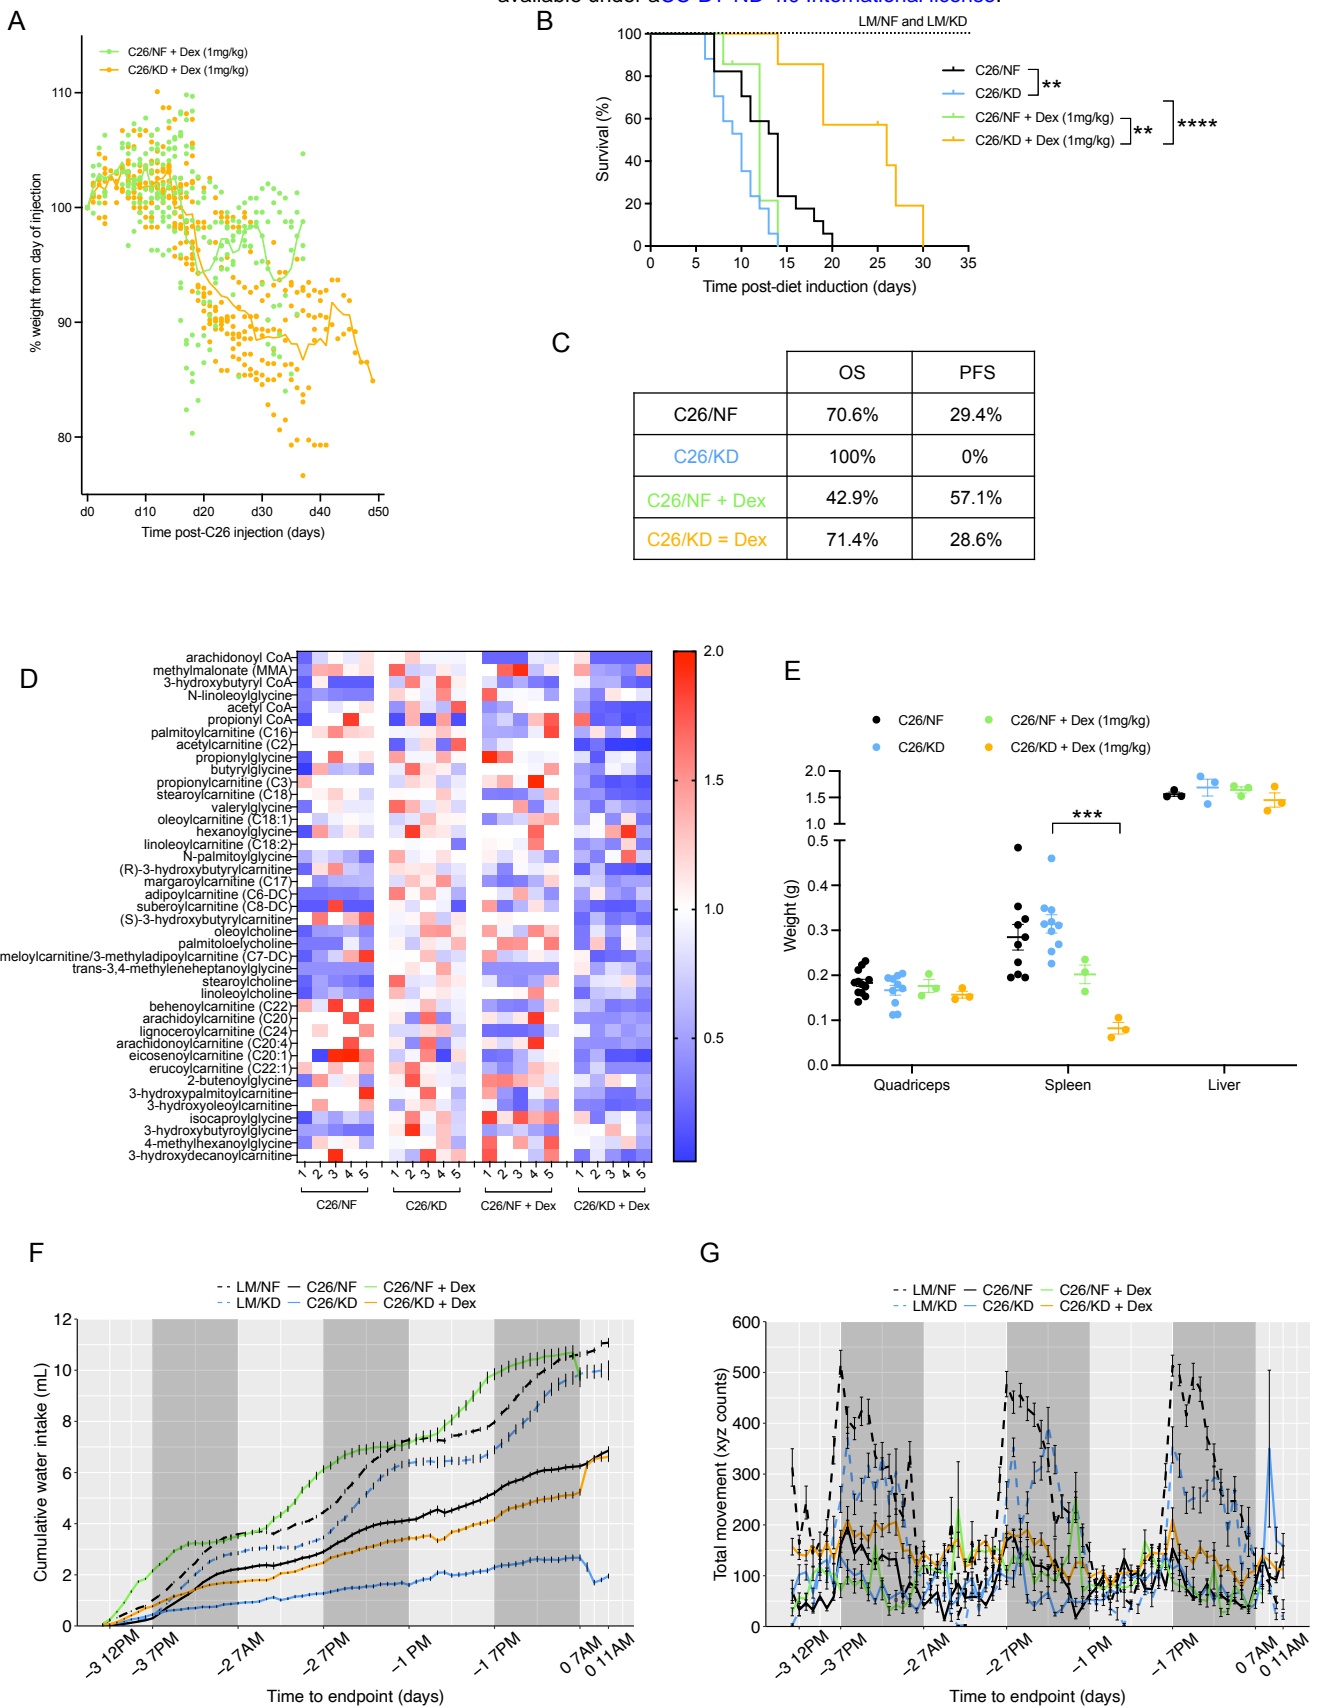

Supplementary Figure 5

|                          | Standard diet<br>(PicoLab Rodent Diet 20) | Ketogenic diet<br>(AIN-76A Modified) |
|--------------------------|-------------------------------------------|--------------------------------------|
| Fat (%)                  | 10.6                                      | 75.1                                 |
| Protein (%)              | 20                                        | 8.6                                  |
| Carbohydrates (%)        | 52.9                                      | 3.2                                  |
| Fiber (%)                | 4.7                                       | 4.8                                  |
| Ash (%)                  | 6.1                                       | 3                                    |
| Moisture (%)             | <10                                       | <10                                  |
| Caloric profile (kcal/g) | 4.07                                      | 7.24                                 |
| Cystine (g/kg)           | 2.8                                       | 0.3                                  |
| Methionine (g/kg)        | 7                                         | 2.2                                  |

## Extended Data Table 1
